# Supplementary material for: Chemical synthesis of the pentasaccharide repeating unit of the O-specific polysaccharide from Escherichia coli O132 in the form of its 2-aminoethyl glycoside
Source: publisher site journal article supplement (doi:10.3762/bjoc.15.249), 2019-10-28
Supplement: Additional file 2 [file 1860-5397-15-249-S2.pdf]

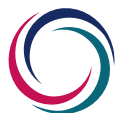

## Supporting Information

for

### **Chemical synthesis of the pentasaccharide repeating unit of the O-specific polysaccharide from *Escherichia coli* O132 in the form of its 2-aminoethyl glycoside**

Debasish Pal and Balaram Mukhopadhyay

*Beilstein J. Org. Chem.* **2019**, *15*, 2563–2568. doi:10.3762/bjoc.15.249

**Copies of the  $^1\text{H}$  and  $^{13}\text{C}$  NMR spectra of all new compounds**

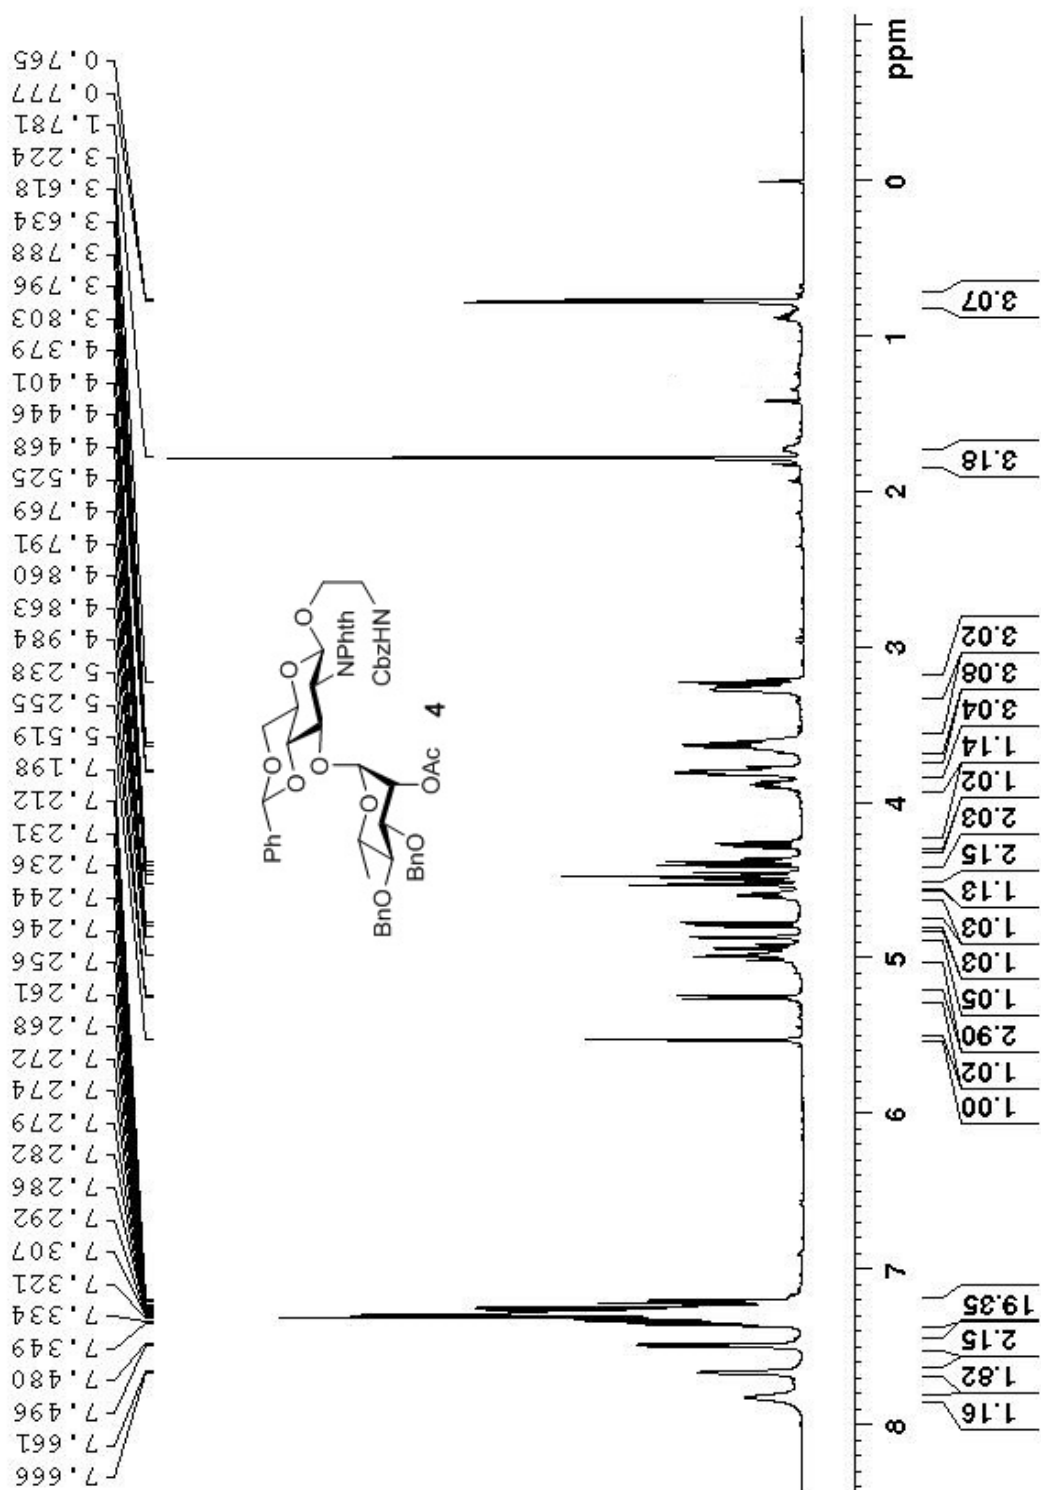

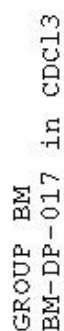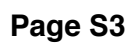

GROUP BM  
BM-DP-068B in CDCl3

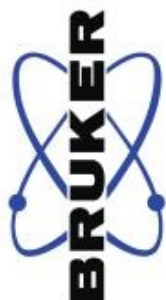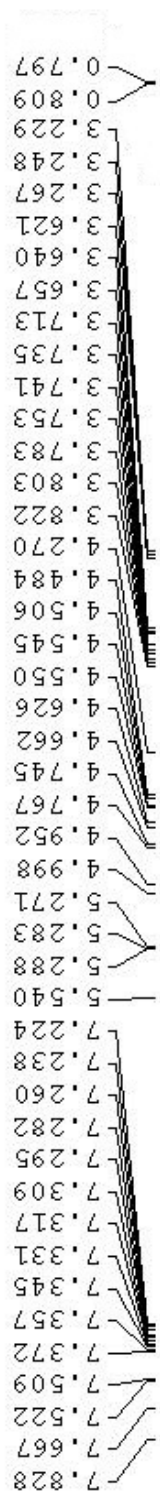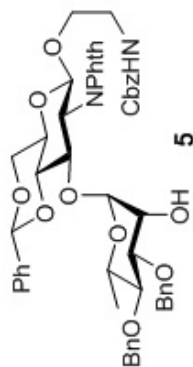

Current Data Parameters  
NAME DI ACCEPTOR  
EXPNO 20  
PROCNO 1

F2 - Acquisition Parameters  
Date\_ 20180730  
Time 11.45  
INSTRUM Bruker default av500  
PROBHD 5 mm PABBO BB/  
PULPROG zg30  
ID 66560  
SOLVENT CDCl3  
NS 16  
DS 2  
SWH 10000.000 Hz  
FIDRES 0.150240 Hz  
AQ 3.3280001 sec  
RG 36  
DW 50.000 usec  
DE 6.50 usec  
TE 298.2 K  
D1 1.00000000 sec  
ID0 1

----- CHANNEL f1 -----  
SF01 500.3430898 MHz  
NUC1 1H  
P1 17.50 usec  
PLW1 10.00000000 W

F2 - Processing parameters  
SI 131072  
SF 500.3400125 MHz  
WDW EM  
SSB 0  
LB 0.60 Hz  
GB 0  
PC 1.00

GROUP BM  
BM-DP-068B in CDCl3

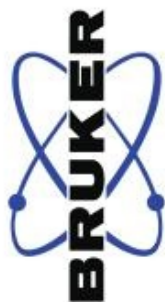

156.10  
138.43  
137.80  
136.85  
136.39  
134.42  
131.07  
128.99  
128.41  
128.39  
128.19  
128.07  
128.01  
127.92  
127.75  
127.65  
127.50  
126.35  
123.69  
101.88  
99.42  
98.78  
80.59  
79.79  
79.51  
77.25  
76.99  
76.74  
74.96  
73.94  
71.76  
69.09  
68.52  
68.47  
67.61  
66.50  
66.38  
56.53  
40.70  
17.15

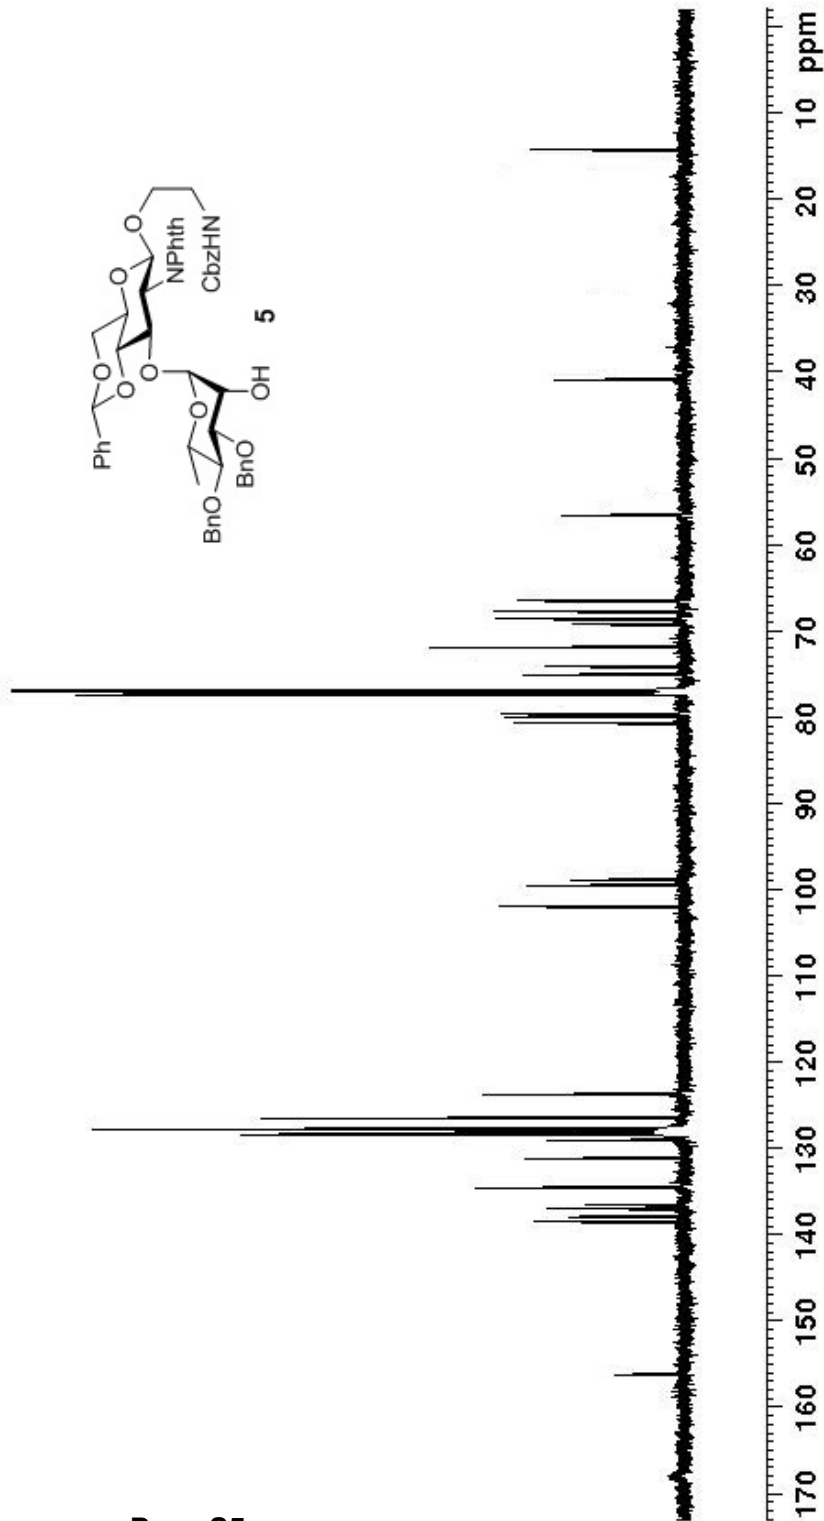

Current Data Parameters  
NAME DI ACCEPTOR  
EXNO 21  
PROCNO 1

F2 - Acquisition Parameters  
Date\_ 20180730  
Time 11.50  
INSIRUM Bruker\_default\_av500  
PROBHD 5 mm PABBO BB/  
PULPROG zgpg30  
ID 65536  
SOLVENT CDCl3  
NS 181  
DS 4  
SWH 43859.648 Hz  
FIDRES 0.669245 Hz  
AQ 0.7471104 sec  
RG 203  
DM 11.400 usec  
DE 6.50 usec  
TE 298.5 K  
D1 2.00000000 sec  
D11 0.03000000 sec  
TD0 1

----- CHANNEL f1 -----  
SFO1 125.8294646 MHz  
NUC1 13C  
P1 11.50 usec  
PLW1 66.00000000 W

----- CHANNEL f2 -----  
SFO2 500.3420014 MHz  
NUC2 1H  
PCPD2 80.00 usec  
PLW2 10.00000000 W  
PLW12 0.47852001 W  
PLW13 0.24068999 W

F2 - Processing parameters  
SI 32768  
SF 125.8106086 MHz  
WDW EM  
SSB 0  
LB 1.00 Hz  
GB 0  
PC 1.40

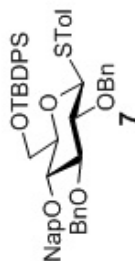



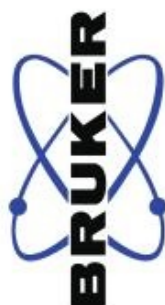

GROUP BM  
BM-DP-063 in CDC13

| Current Data Parameters |           |
|-------------------------|-----------|
| NAME                    | BM-DF-063 |
| EXPNO                   | 72        |
| PROCNO                  | 1         |

|                              |                      |
|------------------------------|----------------------|
| HF2 - Acquisition Parameters |                      |
| Date_                        | 20180723             |
| Time                         | 12.48                |
| INSIRUM                      | Brucker_default_av50 |
| PROBHD                       | 5 mm PABBO BB/-      |
| PULPROG                      | zgpg30               |
| ID                           | 65536                |
| SOLVENT                      | CDCl3                |
| NS                           | 308                  |
| DS                           | 4                    |
| SWH                          | 43859.648 Hz         |
| FIDRES                       | 0.663245 Hz          |
| AQ                           | 0.7471104 sec        |
| RG                           | 203                  |
| DW                           | 11.400 usec          |
| DE                           | 6.50 usec            |
| TE                           | 298.3 K              |
| D1                           | 2.00000000 sec       |
| D11                          | 0.03000000 sec       |
| ID0                          | 1                    |

```
----- CHANNEL f1 -----
SF01      125.8294646 MHz
NUC1      13C
P1        11.50 usec
PLW1      66.00000000 W
```

```
----- CHANNEL f2 -----
SF02      500.3420014 MHZ
NUC2      1H
CPDPRG[2]  waltz16
PCPD2      80.00 usec
PW2        10.00000000 W
P1W12      0.47852001 W
P1W13      0.24063999 W
```

| EF2 - Processing parameters |                 |
|-----------------------------|-----------------|
| SI                          | 32768           |
| SF                          | 125.8106021 MHz |
| WDW                         | EM              |
| SSE                         | 0               |
| LB                          | 1.00 Hz         |
| GB                          | 0               |
| PC                          | 1.40            |

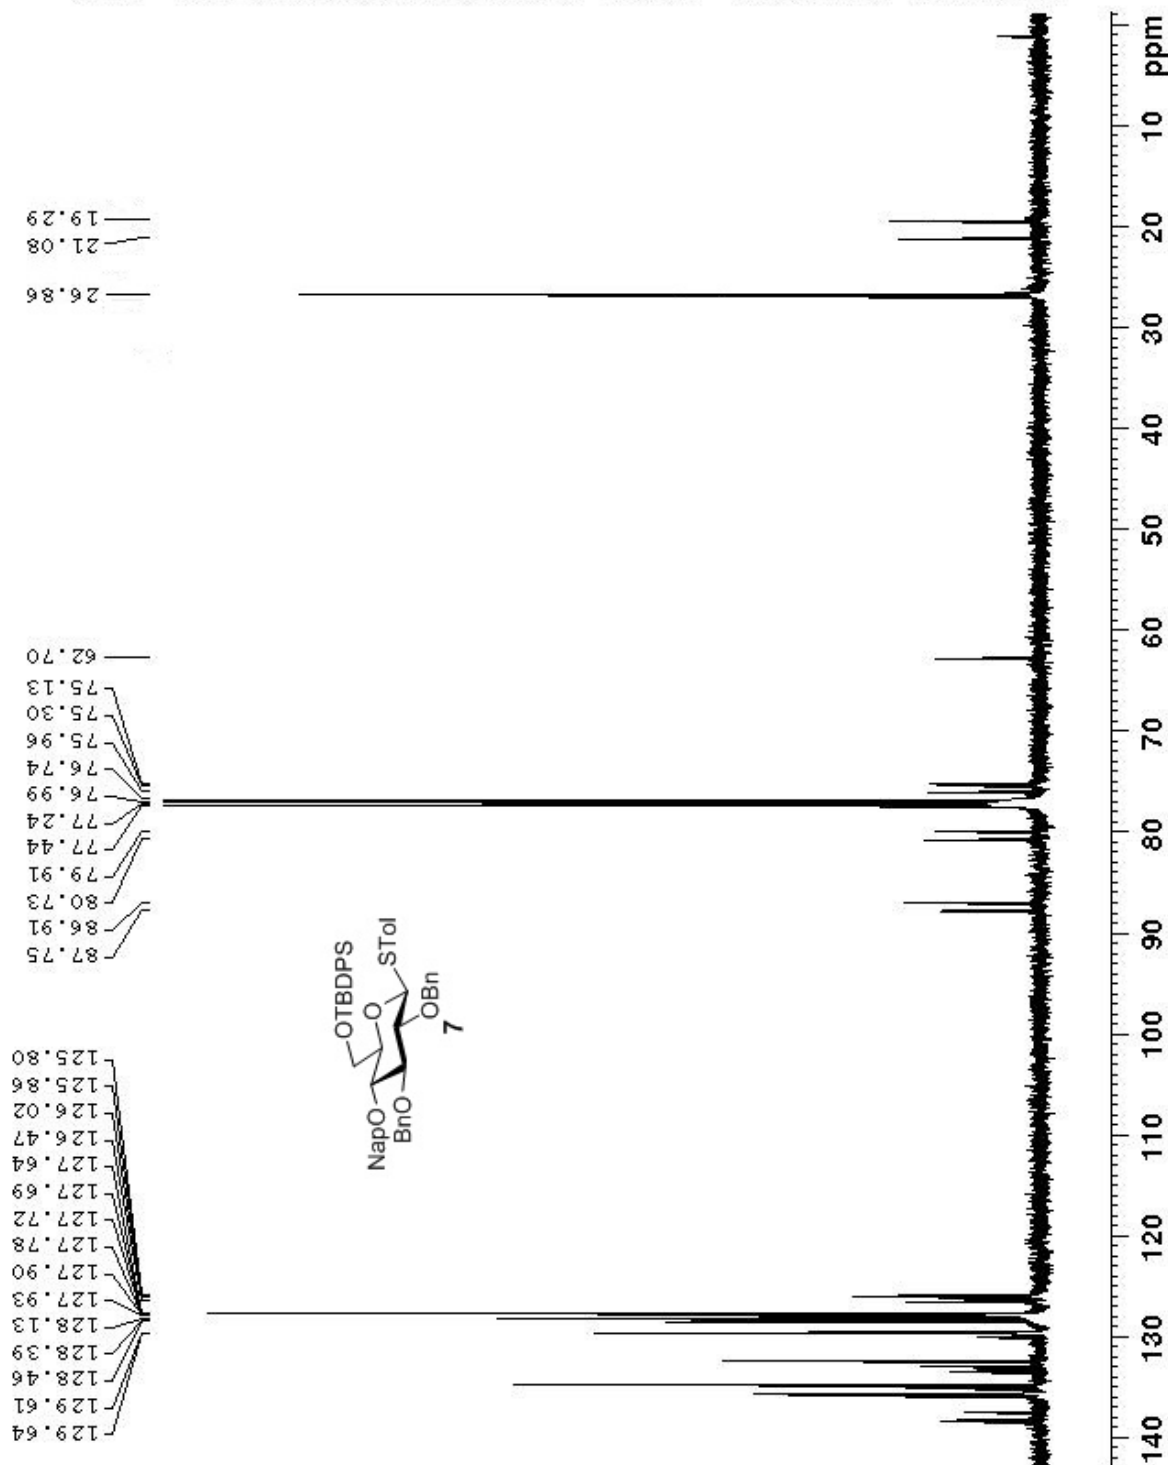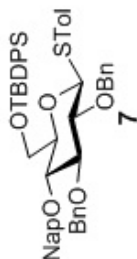

GROUP BM  
BM-DP-063 in CDCl3

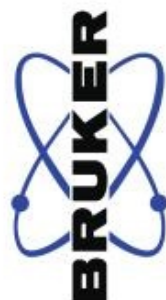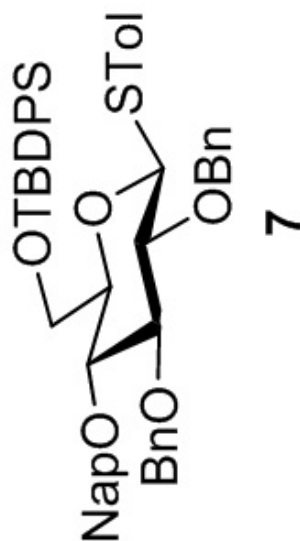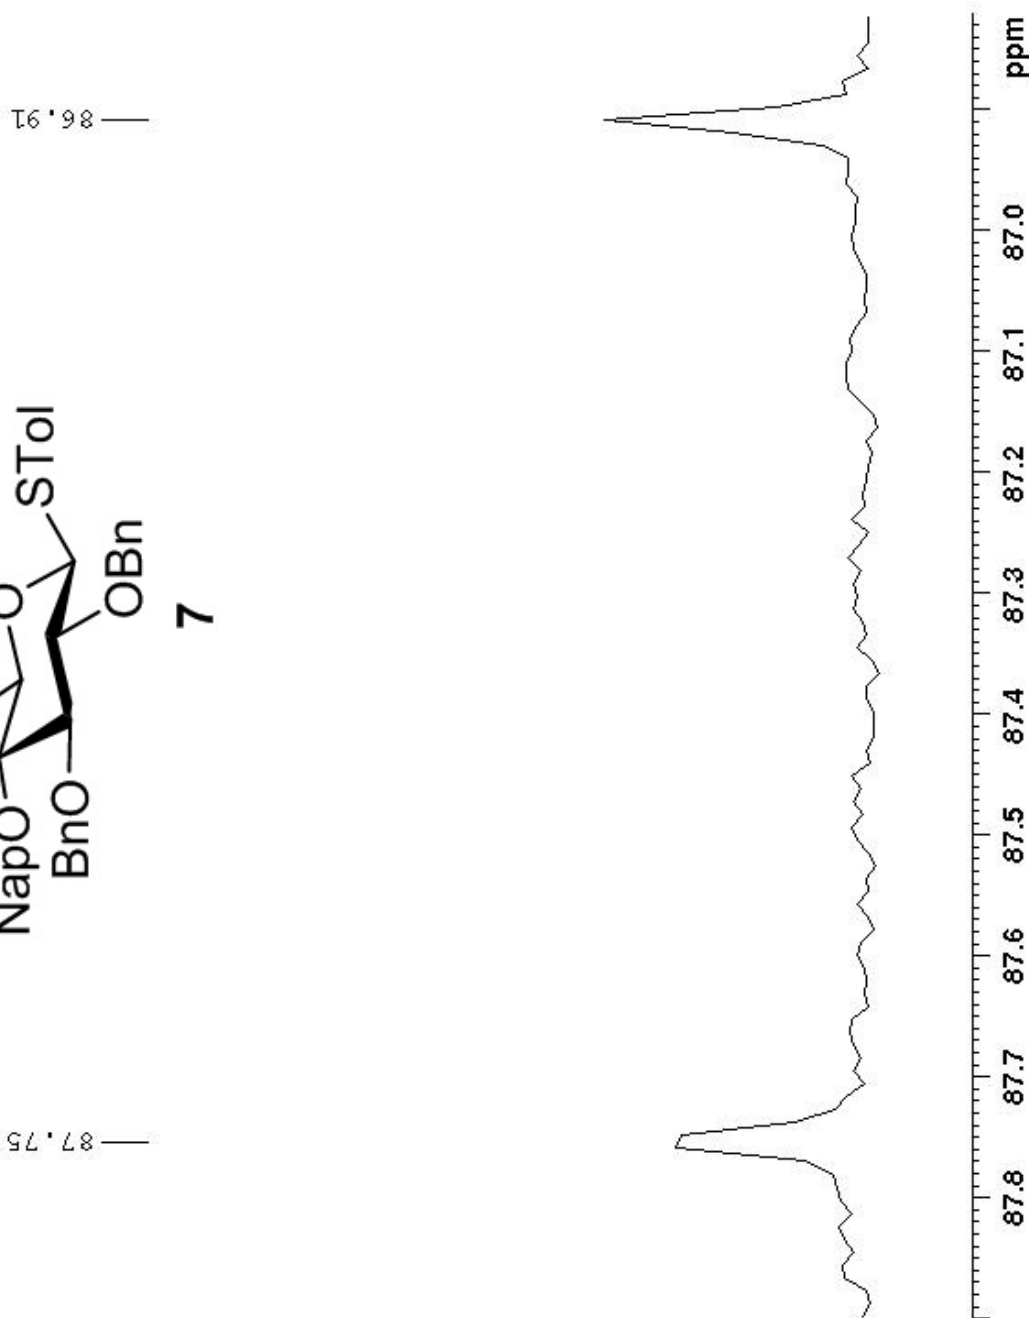

Current Data Parameters  
NAME BM-DP-063  
EXPNO 72  
PROCNO 1

F2 - Acquisition Parameters  
Date\_ 20180723  
Time 12.48  
INSTRUM Bruker\_default\_av50  
PROBHD 5 mm PABBO BB/  
PULPROG zgpg30  
TD 65536  
SOLVENT CDCl3  
NS 308  
DS 4  
SWH 42859.648 Hz  
FIDRES 0.669245 Hz  
AQ 0.7471104 sec  
RG 203  
DM 11.400 usec  
DE 6.50 usec  
TE 298.2 K  
D1 2.00000000 sec  
D11 0.03000000 sec  
TD0 1

----- CHANNEL f1 -----  
SFO1 125.8294646 MHz  
NUC1 13C  
P1 11.50 usec  
PLW1 66.00000000 W

----- CHANNEL f2 -----  
SFO2 500.3420014 MHz  
NUC2 1H  
P2 19.00 usec  
PLW2 10.00000000 W  
PLW12 0.47852001 W  
PLW13 0.24086999 W

F2 - Processing Parameters  
SI 32768  
SF 125.8106021 MHz  
WDW EM  
SSB 0  
LB 1.00 Hz  
GB 0  
PC 1.40



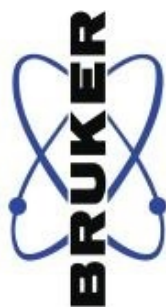

GROUP BM  
BM-DP-064 in CDCl3

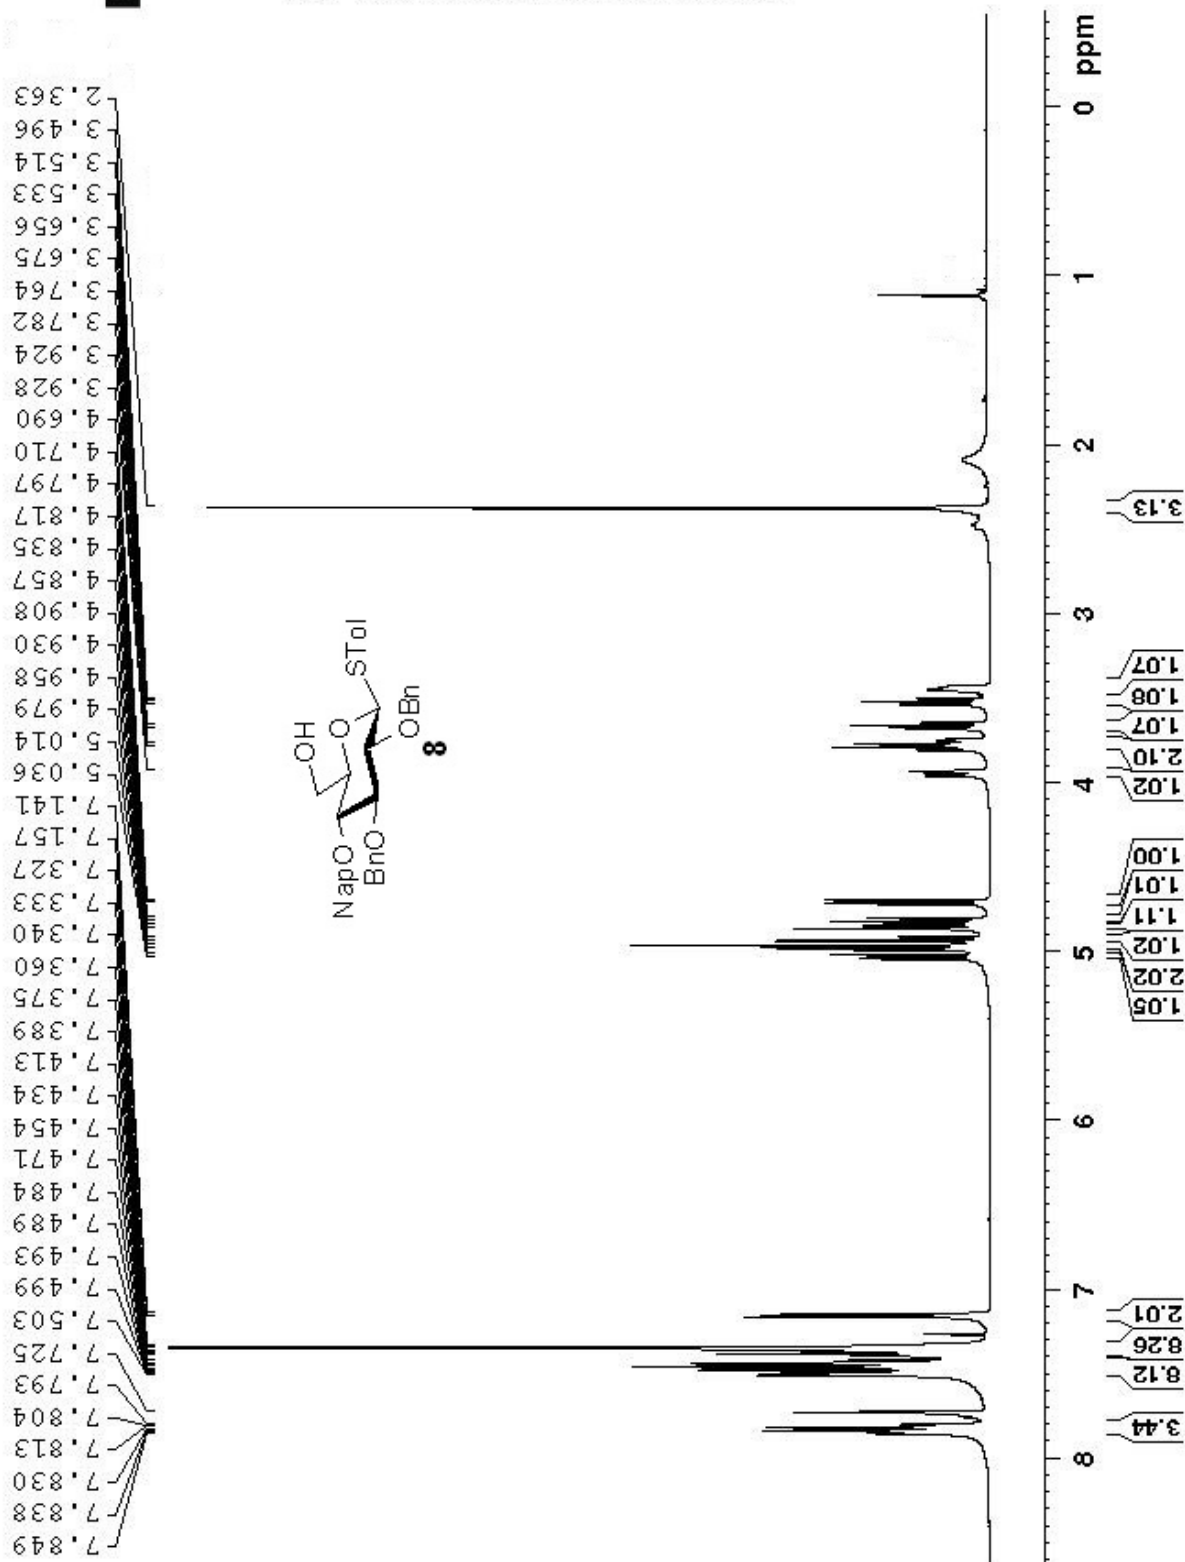

Current Data Parameters  
NAME BM-DP-064  
EXPNO 90  
PROCNO 1  
F2 - Acquisition Parameters  
Date\_ 20160722  
Time 11.20  
INSTRUM spect  
PROBHD 5 mm BBO-1H  
PULPROG zgpg30  
TD 65536  
SOLVENT CDCl3  
NS 16  
DS 2  
SWH 10000.000 Hz  
FIDRES 0.110240 Hz  
AQ 3.3240001 sec  
RG 90.5  
DM 50.000 sec  
DE 0.001 sec  
TE 300.2 K  
D1 1.00000000 sec  
TDO 1  
===== CHANNEL f1 =====  
NUC1 1H  
P1 1A  
PC1 17.50 sec  
NUC2 1H  
P2 10.00000000 N  
PC2 17.50 sec  
===== CHANNEL f2 =====  
F2 - Processing parameters  
SI 32768  
SF 500.1360121 MHz  
WDW EM  
SSB 0  
GB 0  
PC 0.60 Hz  
SC 1.00

GROUP BM  
BM-DP-064 in CDCl3

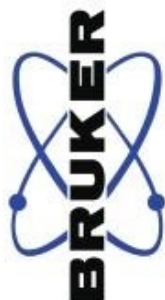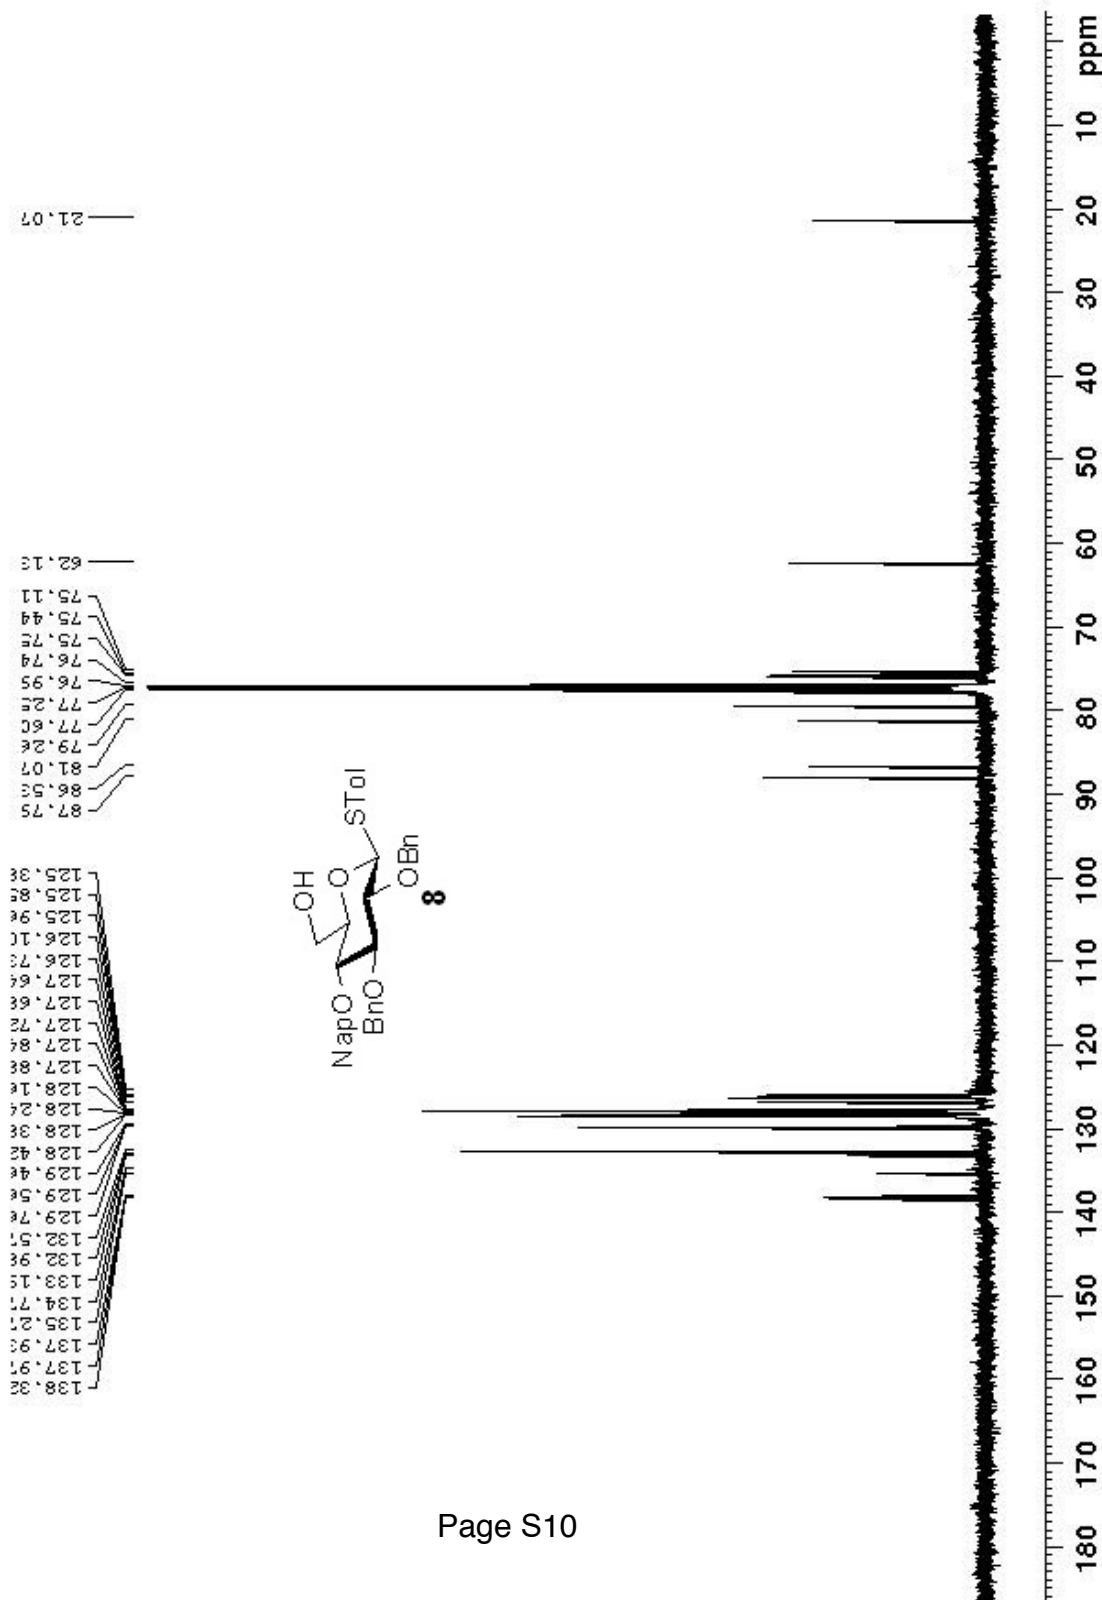

Current Data Parameters  
NAME BM-DP-064  
EXPNO 42  
PROCNO 1  
F2 - Acquisition Parameters  
Date\_ 20140723  
Time 11.39  
INSTRUM spect  
PROBHD 5 mm BBO BO  
PULPROG zgpg30  
TD 65536  
SOLVENT CDCl3  
NS 202  
DS 2  
SWH 42453.646 Hz  
FIDRES 0.66285 Hz  
AQ 0.787108 sec  
RG 302  
SQ 11.400 usec  
CW 2.000 usec  
CR 2.000 usec  
GB 284.7 K  
D1 2.00000000 sec  
D11 0.02000000 sec  
TD0 1  
===== CHANNEL f1 =====  
NUC1 125.062966 MHz  
NUC2 13C  
P1 11.50 usec  
PL1 0.00000000 M  
===== CHANNEL f2 =====  
NUC2 500.1345014 MHz  
NUC2 1H  
P2 12.00 usec  
PL2 0.00000000 M  
===== CHANNEL f3 =====  
NUC3 10.00000000 MHz  
NUC3 13C  
P3 0.8742001 M  
PL3 0.2806833 M  
F2 - Processing parameters  
SI 32768  
SF 125.010016 MHz  
WDW EM  
SSB 0  
LB 1.00 Hz  
GB 0  
PC 1.40

GROUP BM  
BM-DP-065 in CDCl3

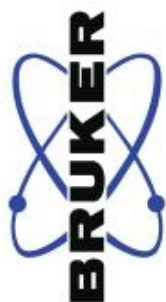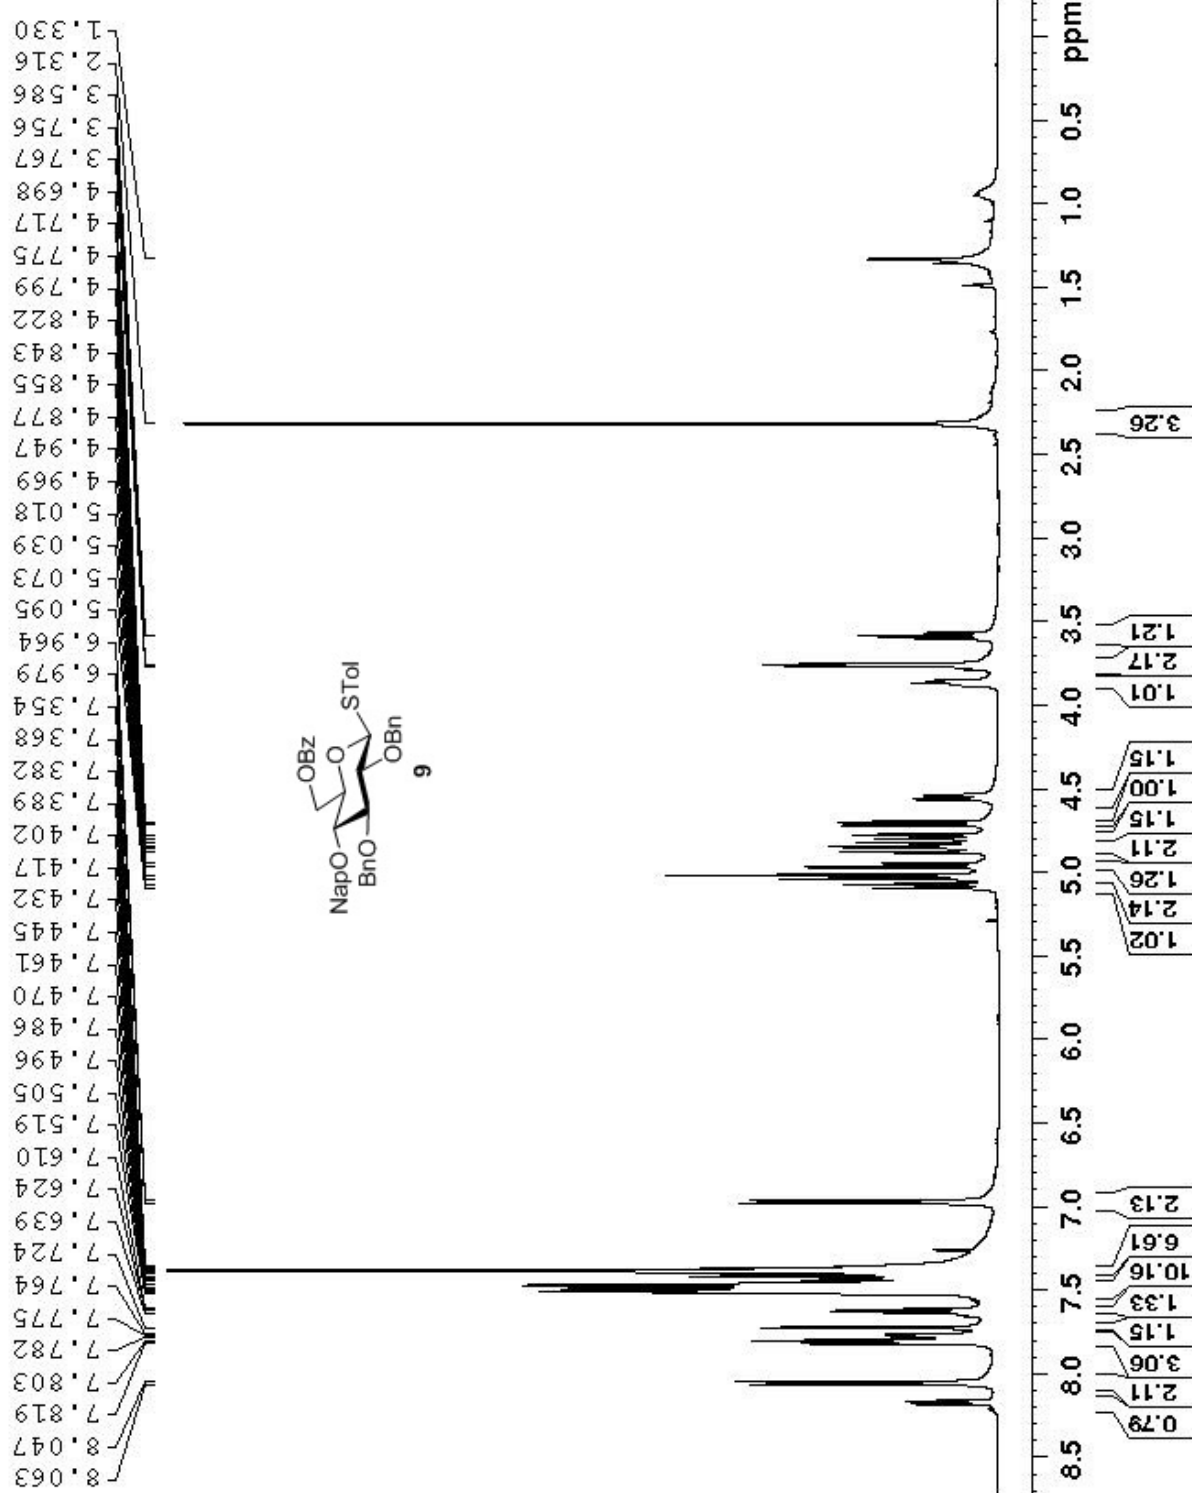

NAME: BM-DP-065  
EXPNO: 1  
PROCNO: 1  
F2 - Acquisition parameters  
Date\_ 20100701  
Time 11.34  
INSTRUM spect  
PROBHD 5 mm BBO  
PULPROG zgpg30  
TD 65536  
SOLVENT CDCl3  
DE 100  
TE 300.2  
FIDRES 0.10000000 Hz  
AQ 0.110880 Hz  
RG 512  
DQ 0.00000000 Hz  
DE 10.00000000 Hz  
TE 300.2 K  
F2 - Processing parameters  
SI 32768  
SF 300.1360000 MHz  
WDW EM  
SSB 0  
GB 0  
PC 1.00

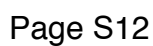

GROUP BM  
BM-DP-069 in CDCl3

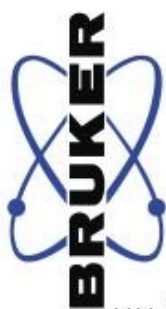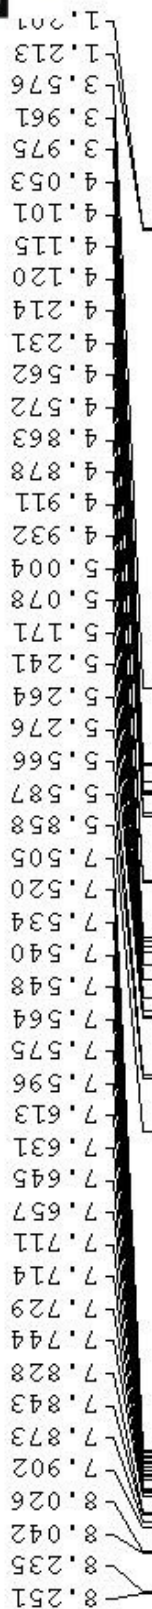

Current Data Parameters  
NAME TRI WAF-PROTECTED  
EXPNO 70  
PROCNO 1

F2 - Acquisition Parameters  
Date\_ 20180801  
Time 12.03  
INSTRUM spect-aezuli-av500  
PROBHD 5 mm PABBO BB/

PULPROG zg30  
TD 65560  
FIDRES 0.3280001 Hz  
AQ 0.13  
RG 40.3  
DQ 50.000 usec  
DE 6.50 usec  
TE 298.2 K  
D1 1.00000000 sec  
TD0 1

SOLVENT CDCl3  
NS 32  
DS 2  
SWH 10000.000 Hz  
FIDRES 0.150240 Hz  
AQ 3.3280001 sec  
RG 40.3  
DQ 50.000 usec  
DE 6.50 usec  
TE 298.2 K  
D1 1.00000000 sec  
TD0 1

===== CHANNEL f1 =====  
SFO1 500.345078 MHz  
NUC1 1H  
P1 17.50 usec  
PL1 10.00000000 W

F2 - Processing parameters  
SI 131072  
SF 500.345078 MHz  
WDW EM  
SSB 0  
LB 0.60 Hz  
GB 0  
PC 1.00

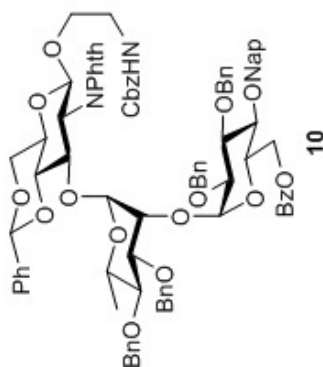



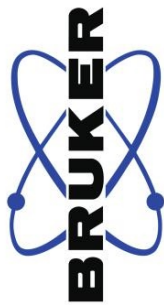

GROUP BM  
BM-DP-069 in CDCl3

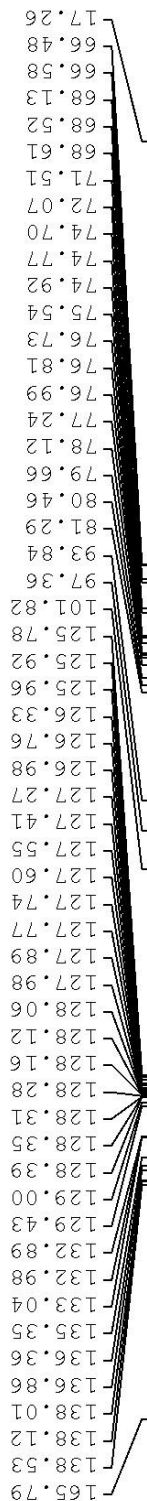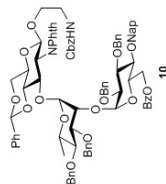

Current Data Parameters  
NAME TRI NAP-PROTECTED  
EXPNO 71  
PROCNO 1

F2 - Acquisition Parameters  
Date\_ 20180801  
Time 12.09  
INSTRUM Bruker\_default\_av500  
PROBHD 5 mm PABBO BB/-  
PULPROG zgpg30  
TD 65336  
SOLVENT CDCl3  
NS 199  
DS 4  
SWH 43859.648 Hz  
FIDRES 0.669245 Hz  
AQ 0.7471104 sec  
RG 203  
DW 11.400 usec  
DE 6.50 usec  
TE 299.2 K  
D1 2.00000000 sec  
D11 0.03000000 sec  
TD0 1

===== CHANNEL f1 =====  
SFO1 125.8294646 MHz  
NUC1 13C  
P1 11.50 usec  
PLW1 66.00000000 W

===== CHANNEL f2 =====  
SFO2 500.3420014 MHz  
NUC2 1H  
P2 11.50 usec  
PLW2 66.00000000 W  
PCPD2 80.00 usec  
PLW2 10.00000000 W  
PLW12 0.47852001 W  
PLW13 0.24068999 W

F2 - Processing parameters  
SI 32768  
SF 125.8106095 MHz  
WDW EM  
SSB 0  
LB 1.00 Hz  
GB 0  
PC 1.40



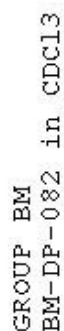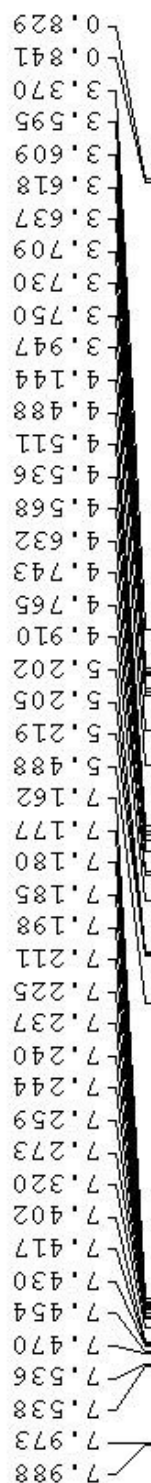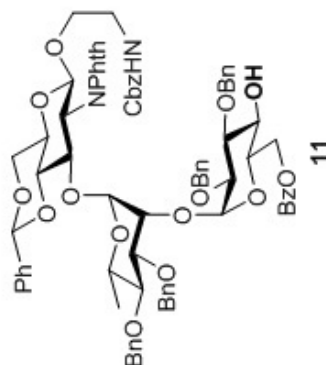

```

Current Data Parameters
NAME      TRI ACCEPTOR
EXTNO     10
PROCNO    1

F2 - Acquisition Parameters
Date_     20181001
Time       11.11
INSTRUM   BrukerDefault_Av500
PROBHD    5 mm PABBO BBP/
PULPROG   zg30
ID        66360
SOLVENT   CDCl3
NS         16
DS         2
SWH        10000.000 Hz
FIDRES     0.150240 Hz
AQ         3.8280001 sec
RG         50.8
DE         50.000000 sec
TE         6.50 sec
IE         2261.6 K
DL         1.00000000 sec
ID0        1

=====
CHANNEL F1
=====
SFO1      500.8430988 MHz
NUC1       13C
P1         17.50 sec
PL1        0
PL12       10.00000000 W

F2 - Processing parameters
SI         131072
SF         500.8400327 MHz
SSE        0
SSF        0
WDW         EM
GE         0
PC         1.00

```

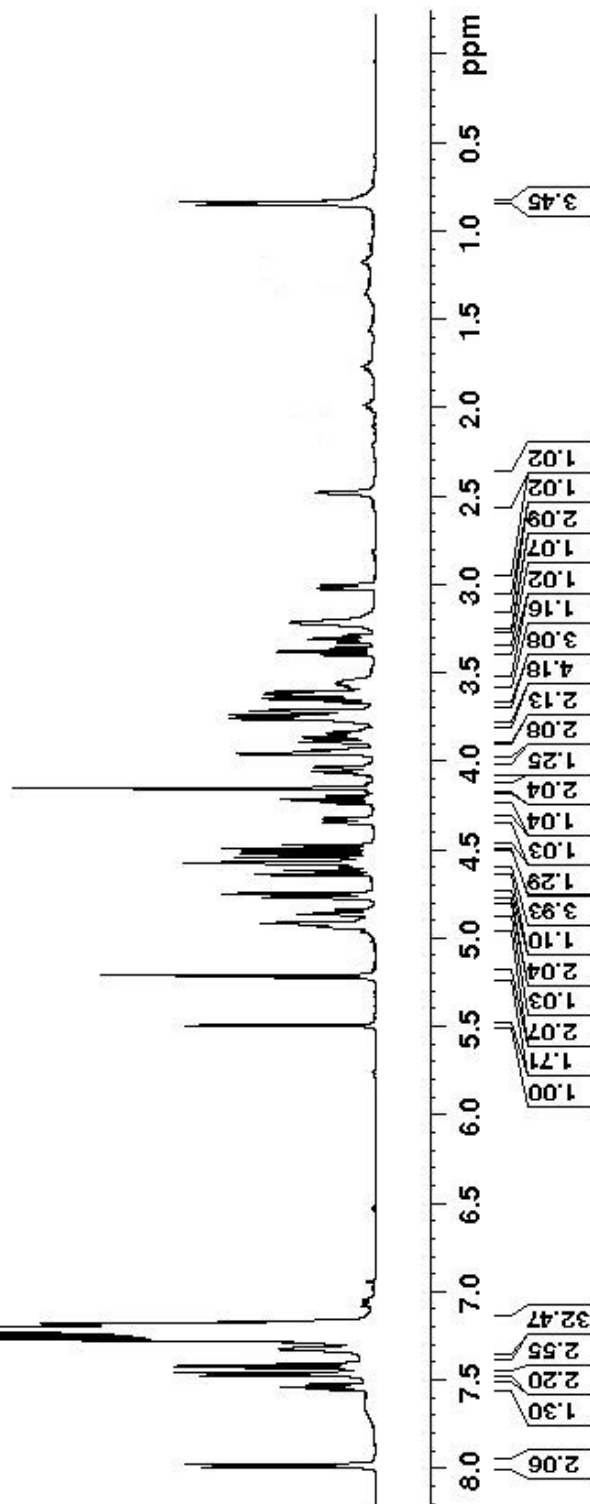

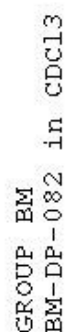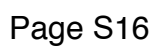

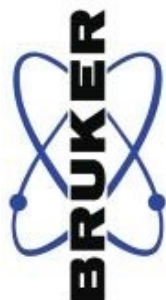

GROUP BM  
BM-DP-076 in CDCl3

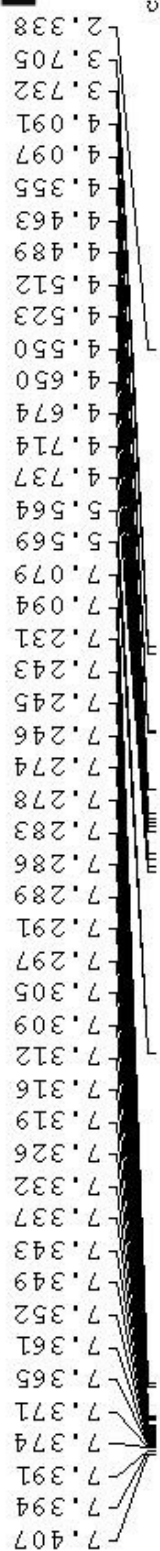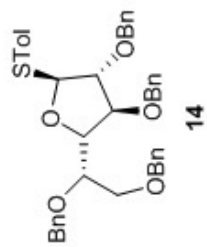

Current Data Parameters  
NAME BM-DP-076  
EXPNO 230  
PROCNO 1

F2 - Acquisition Parameters  
Date\_ 20180927  
Time 16.35  
INSTRUM Bruker default av50  
PROBHD 5 mm PABBO BB/  
PULPROG zg30  
ID e6560  
SOLVENT CDCl3  
NS 16  
DS 2  
SWH 10000.000 Hz  
FIDRES 0.150240 Hz  
AQ 3.3280001 sec  
RG 45.2  
DW 50.000 usec  
DE 6.50 usec  
TE 2237.4 K  
D1 1.00000000 sec  
TD0 1

----- CHANNEL f1 -----  
SFO1 500.3430898 MHz  
NUC1 1H  
P1 17.50 usec  
PLW1 10.00000000 W

F2 - Processing parameters  
SI 131072  
SF 500.3400186 MHz  
WDW EM  
SSB 0  
LB 0.30 Hz  
GB 0  
PC 1.00

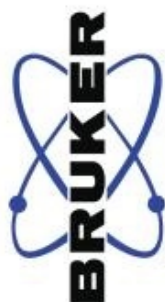

GROUP BM  
BM-DP-076 in CDCl3

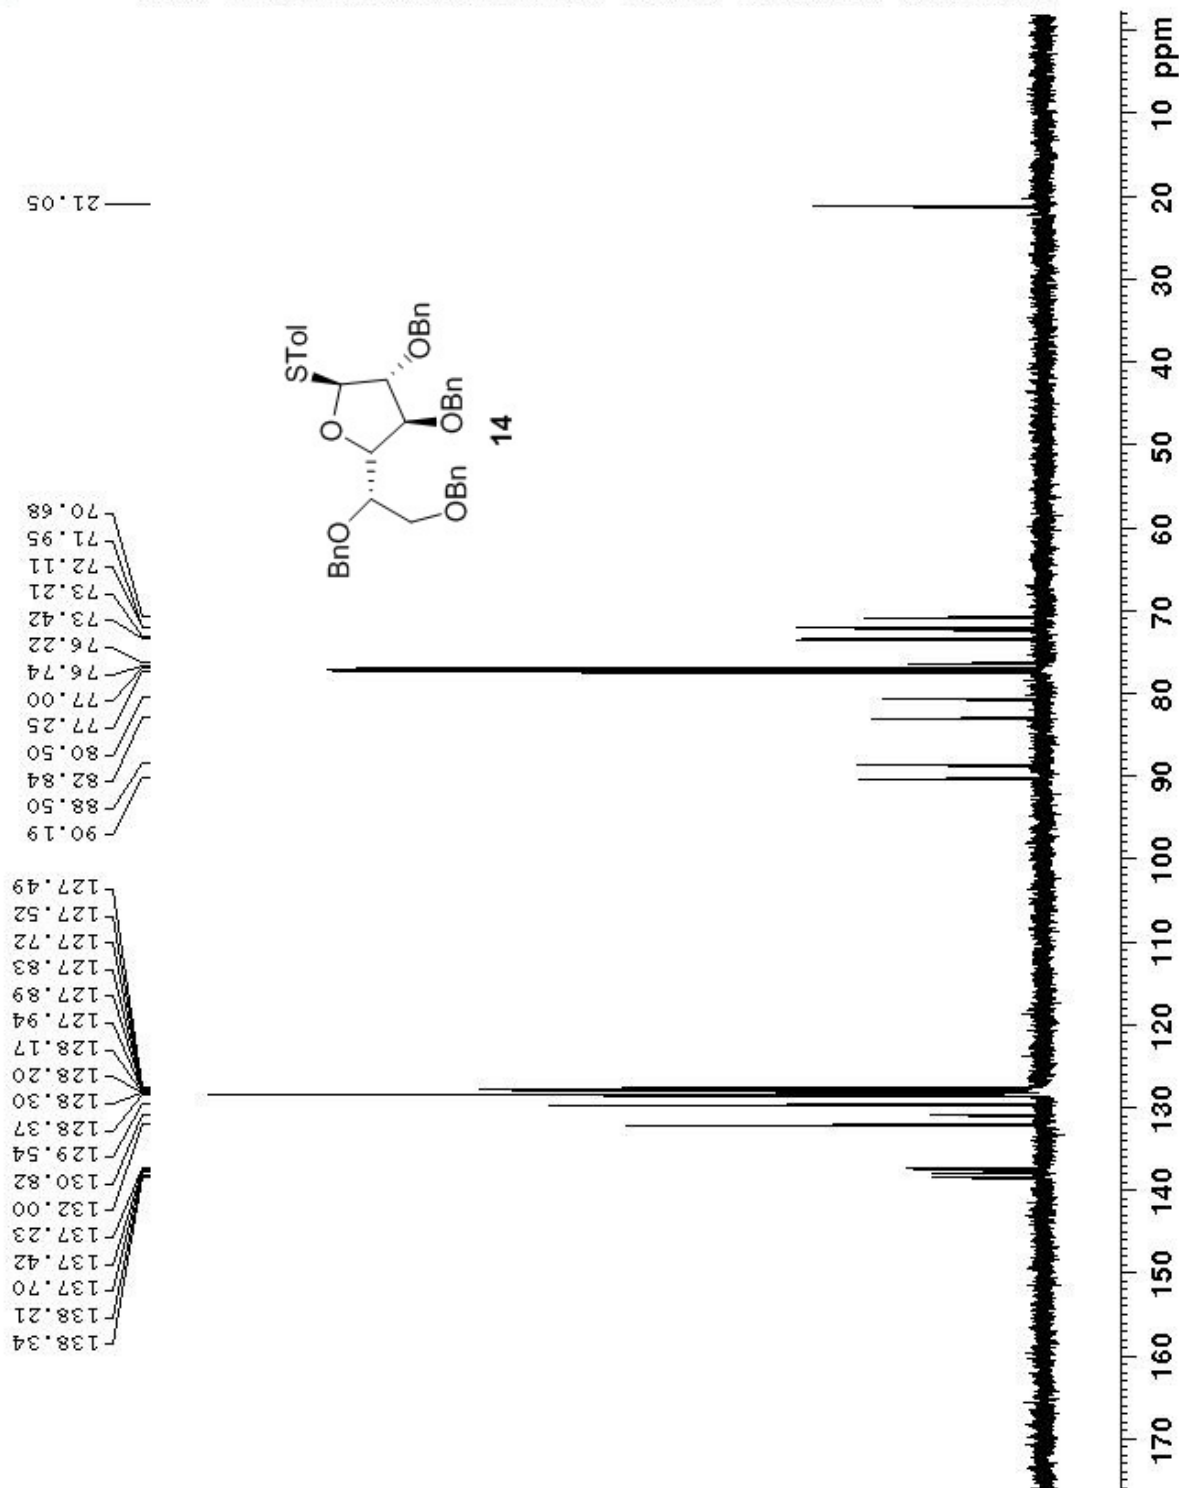

Current Data Parameters  
NAME BM-DP-076  
EXPNO 231  
PROCNO 1

F2 - Acquisition Parameters  
Date\_ 20180927  
Time 16.41  
INSTRUM Bruker\_default\_ev50i  
PROBHD 5 mm PABO BB/  
PULPROG zgpg30  
TD 65536  
SOLVENT CDCl3  
NS 51  
DS 4  
SWH 43859.648 Hz  
FIDRES 0.669245 Hz  
AQ 0.7471104 sec  
RG 203  
DM 11.400 usec  
DE 6.50 usec  
TE 2250.9 K  
D1 2.00000000 sec  
D11 0.03000000 sec  
TD0 1

----- CHANNEL f1 -----  
SFO1 125.8294646 MHz  
NUC1 13C  
P1 11.50 usec  
PLW1 66.00000000 W

----- CHANNEL f2 -----  
SFO2 500.2420014 MHz  
NUC2 1H  
PCPD2 waltz16  
PCPD2 80.00 usec  
PLW2 10.00000000 W  
PLW12 0.47852001 W  
PLW13 0.24088999 W

F2 - Processing Parameters  
SI 32768  
SF 125.8106059 MHz  
WDW EM  
SSB 0  
LB 1.00 Hz  
GB 0  
PC 1.10

GROUP BM  
BM-DP-077ALPHA in CDCl3

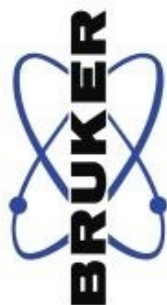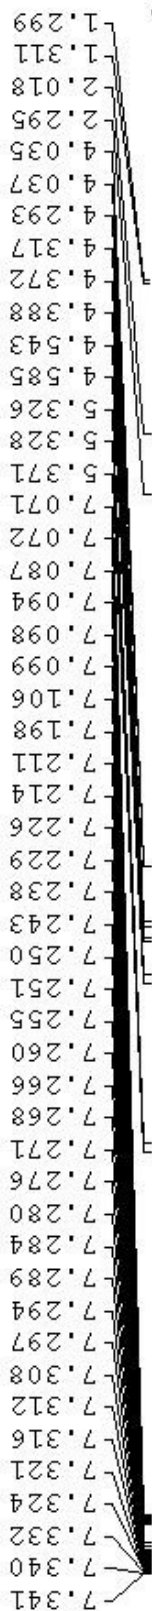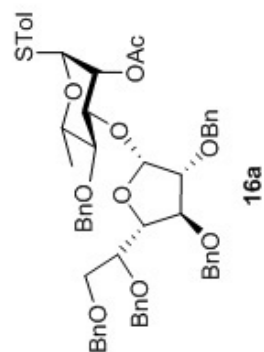

Current Data Parameters  
NAME DI-DONOR ALPHA  
EXPNO 240  
PROCNO 1  
F2 - Acquisition Parameters  
Date\_ 20180927  
Time 17.02  
INSTRUM Bruker.default\_av500  
PROBHD 5 mm PABBO BB/  
PULPROG zgpg30  
ID C6360  
SOLVENT CDCl3  
NS 16  
DS 2  
SWH 10000.000 Hz  
FIDRES 0.150240 Hz  
AQ 5.3280001 sec  
RG 80.6  
DQ 50.000 usec  
DE 6.20 usec  
TE 2229.3 K  
D1 1.00000000 sec  
ID0 1  
CHANNEL f1  
SFOL 500.843098 MHz  
NUC1 1H  
P1 17.50 usec  
PL1 10.00000000 W  
F2 - Processing parameters  
SI 131072  
SF 500.8400277 MHz  
WDW EM  
SSB 0  
LB 0.30 Hz  
GB 0  
PC 1.00



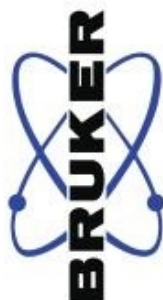

GROUP BM  
BM-DP-077ALPHA in CDCl3

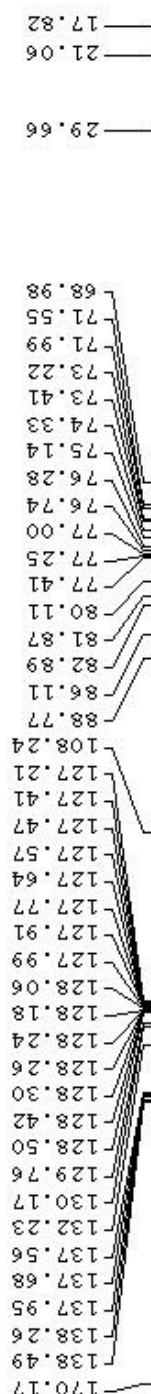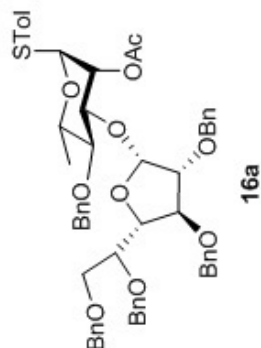

Current Data Parameters  
NAME DI-DONOR ALPHA  
EXPNO 241  
PROCNO 1

F2 - Acquisition Parameters  
Date\_ 20180927  
Time 17.05  
INSTRUM Bruker default\_av500  
PROBHD 5 mm PABBO BB/  
PULPROG zgpg30  
ID 65536  
SOLVENT CDCl3  
NS 136  
DS 4  
SWH 43859.648 Hz  
FIDRES 0.669245 Hz  
AQ 0.7471104 sec  
RG 203  
DW 11.400 usec  
DE 6.50 usec  
IE 2260.0 K  
D1 2.00000000 sec  
D11 0.03000000 sec  
TD0 1

CHANNEL f1  
SFO1 125.8294646 MHz  
NUC1 13C  
P1 11.50 usec  
PLW1 66.00000000 W

CHANNEL f2  
SFO2 500.3420014 MHz  
NUC2 1H  
PCPD2 waltz16  
PCPD2 80.00 usec  
PLW2 10.00000000 W  
PLW12 0.47852001 W  
PLW13 0.24068999 W

F2 - Processing parameters  
SI 32768  
SF 125.8106004 MHz  
WDW EM  
SSB 0  
LB 1.00 Hz  
GB 0  
PC 1.10



GROUP BM  
BM-DP-077BETA in CDCl3

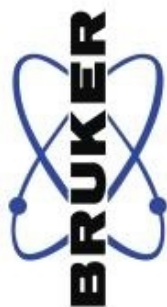

7.400  
7.387  
7.376  
7.373  
7.361  
7.348  
7.307  
7.304  
7.301  
7.292  
7.276  
7.268  
7.264  
7.252  
7.250  
7.236  
7.232  
7.227  
7.224  
7.221  
7.216  
7.211  
7.210  
7.206  
7.200  
7.197  
7.193  
7.191  
7.179  
7.175  
7.080  
5.290  
5.287  
4.681  
4.652  
4.647  
4.458  
4.435  
4.301  
4.289  
2.292  
1.910  
1.261  
1.248

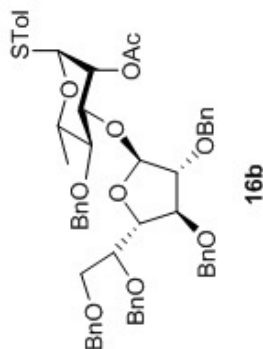

Current Data Parameters  
NAME DI-DONOR BETA  
EXPNO 250  
PROCNO 1

F2 - Acquisition Parameters  
Date\_ 20180927  
Time 17.31  
INSTRUM Bruker\_default\_av500  
PROBHD 5 mm PABBO BB/  
PULPROG zg30  
ID 66560  
SOLVENT CDCl3  
NS 16  
DS 2  
SWH 10000.000 Hz  
FIDRES 0.150240 Hz  
AQ 3.3280001 sec  
RG 80.6  
DW 50.000 usec  
DE 6.50 usec  
TE 2238.3 K  
D1 1.00000000 sec  
TD0 1

----- CHANNEL f1 -----  
SFO1 500.3430898 MHz  
NUC1 1H  
P1 17.50 usec  
PLW1 10.00000000 W

F2 - Processing parameters  
SI 131072  
SF 500.3400277 MHz  
WDW EM  
SSB 0  
LB 0.30 Hz  
GB 0  
PC 1.00

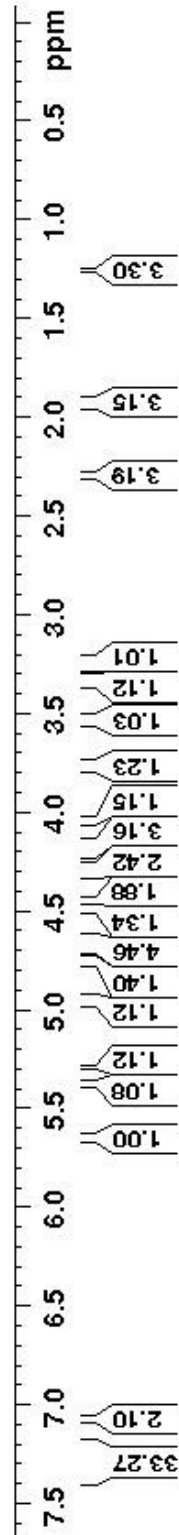

GROUP BM  
BM-DP-077BETA in CDCl3

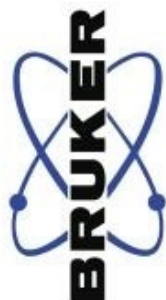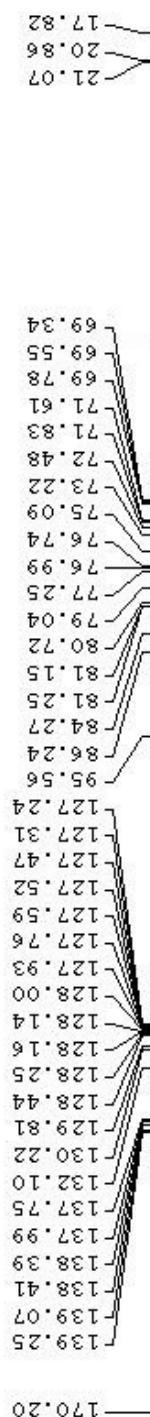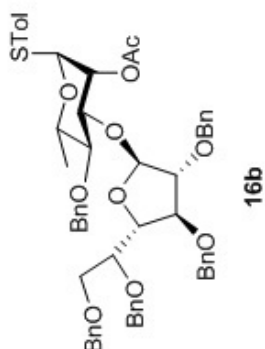

Current Data Parameters  
NAME DI-DONOR BETA  
EXPNO 251  
PROCNO 1  
F2 - Acquisition Parameters  
Date\_ 20180927  
Time 17.35  
INSTRUM spect  
PROBHD 5 mm PABO BB/  
PULPROG zgpg30  
TD 65536  
FIDRES 0.3536  
SOLVENT CDCl3  
NS 368  
DS 4  
SWH 43839.648 Hz  
FIDRES 0.669245 Hz  
AQ 0.7471104 sec  
RG 203  
DC 11.400 uV  
DE 6.50 uV  
TE 2277.6 K  
D1 2.00000000 sec  
D11 0.02000000 sec  
TD0 1  
----- CHANNEL f1 -----  
STO1 125.829466 MHz  
NUC1 13C  
P1 11.50 uV  
PLW1 66.00000000 W  
----- CHANNEL f2 -----  
STO2 500.3020010 MHz  
NUC2 1H  
P2 1.00 uV  
PLW2 10.00000000 W  
PLW12 0.4752001 W  
PLW13 0.2406899 W  
F2 - Processing parameters  
SI 32768  
SF 125.810577 MHz  
WDW EM  
SSB 0  
LB 1.00 Hz  
GB 0  
PC 1.10

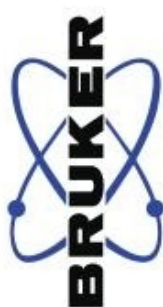

GROUP BM  
BM-DP-079PENTA in CDCl3

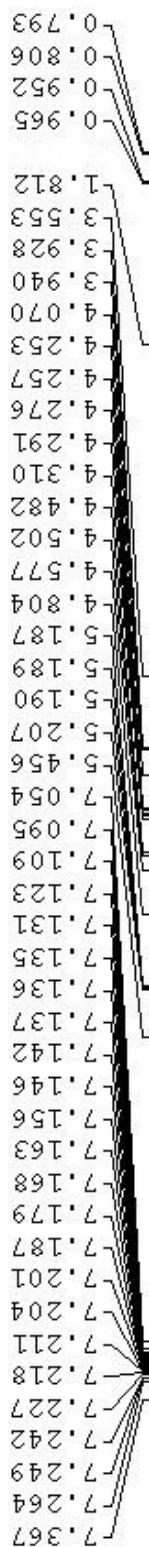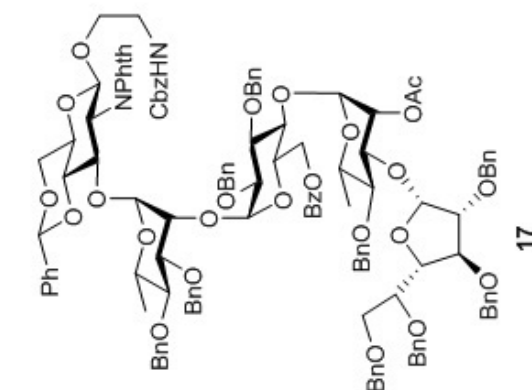

Current Data Parameters  
NAME PENTA PROTECTED  
EXPNO 290  
PROCNO 1

F2 - Acquisition Parameters  
Date\_ 20180927  
Time 18.43  
INSTRUM Bruker default av50  
PROBHD 5 mm PABBO BB/  
PULPROG zg30  
ID 66560  
SOLVENT CDCl3  
NS 16  
DS 2  
SWH 10000.000 Hz  
FIDRES 0.150240 Hz  
AQ 3.3280001 sec  
RG 50.8  
DW 50.000 usec  
DE 6.50 usec  
TE 2286.4 K  
D1 1.00000000 sec  
TD0 1

----- CHANNEL f1 -----  
SF01 500.3430898 MHz  
NUC1 1H  
P1 17.50 usec  
PLW1 10.00000000 W

F2 - Processing parameters  
SI 131072  
SF 500.3400632 MHz  
WDW EM  
SSB 0  
LB 0.30 Hz  
GB 0  
PC 1.00

GROUP BM  
BM-DP-079PENTA in CDCl3

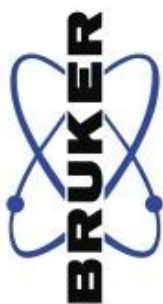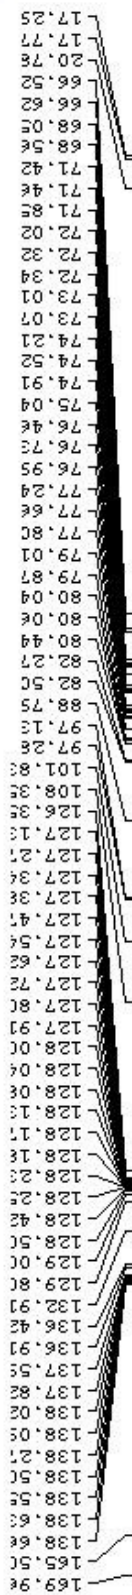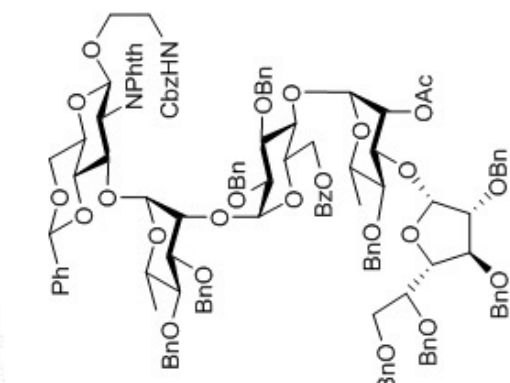

17

Current Data Parameters  
NAME PENTA PROTECTED  
EXPNO 273  
PROCNO 1

F2 - Acquisition Parameters  
Date\_ 20180727  
Time 19.10  
INSTRUM spect  
PROBHD 5 mm F400 BBO  
PULPROG zgpg30  
TD 65536  
FIDRES 0.4752001 Hz  
AQ 0.7971104 sec  
RG 203  
DQ 11.400 usec  
DE 6.50 usec  
TE 223.2 K  
D1 2.00000000 sec  
O11 0.03000000 sec  
TD0 1

----- CHANNEL f1 -----  
STO1 125.824646 MHz  
NUC1 13C  
P1 11.50 usec  
PL1 66.00000000 W

----- CHANNEL f2 -----  
STO2 500.320014 MHz  
NUC2 1H  
P2 18.00 usec  
PL2 10.00000000 W  
PL12 0.4752001 W  
PL13 0.4752001 W

F2 - Processing parameters  
SI 32768  
SF 125.810626 MHz  
WDW 0  
SSB 0  
LB 1.00 Hz  
GB 0  
PC 1.10



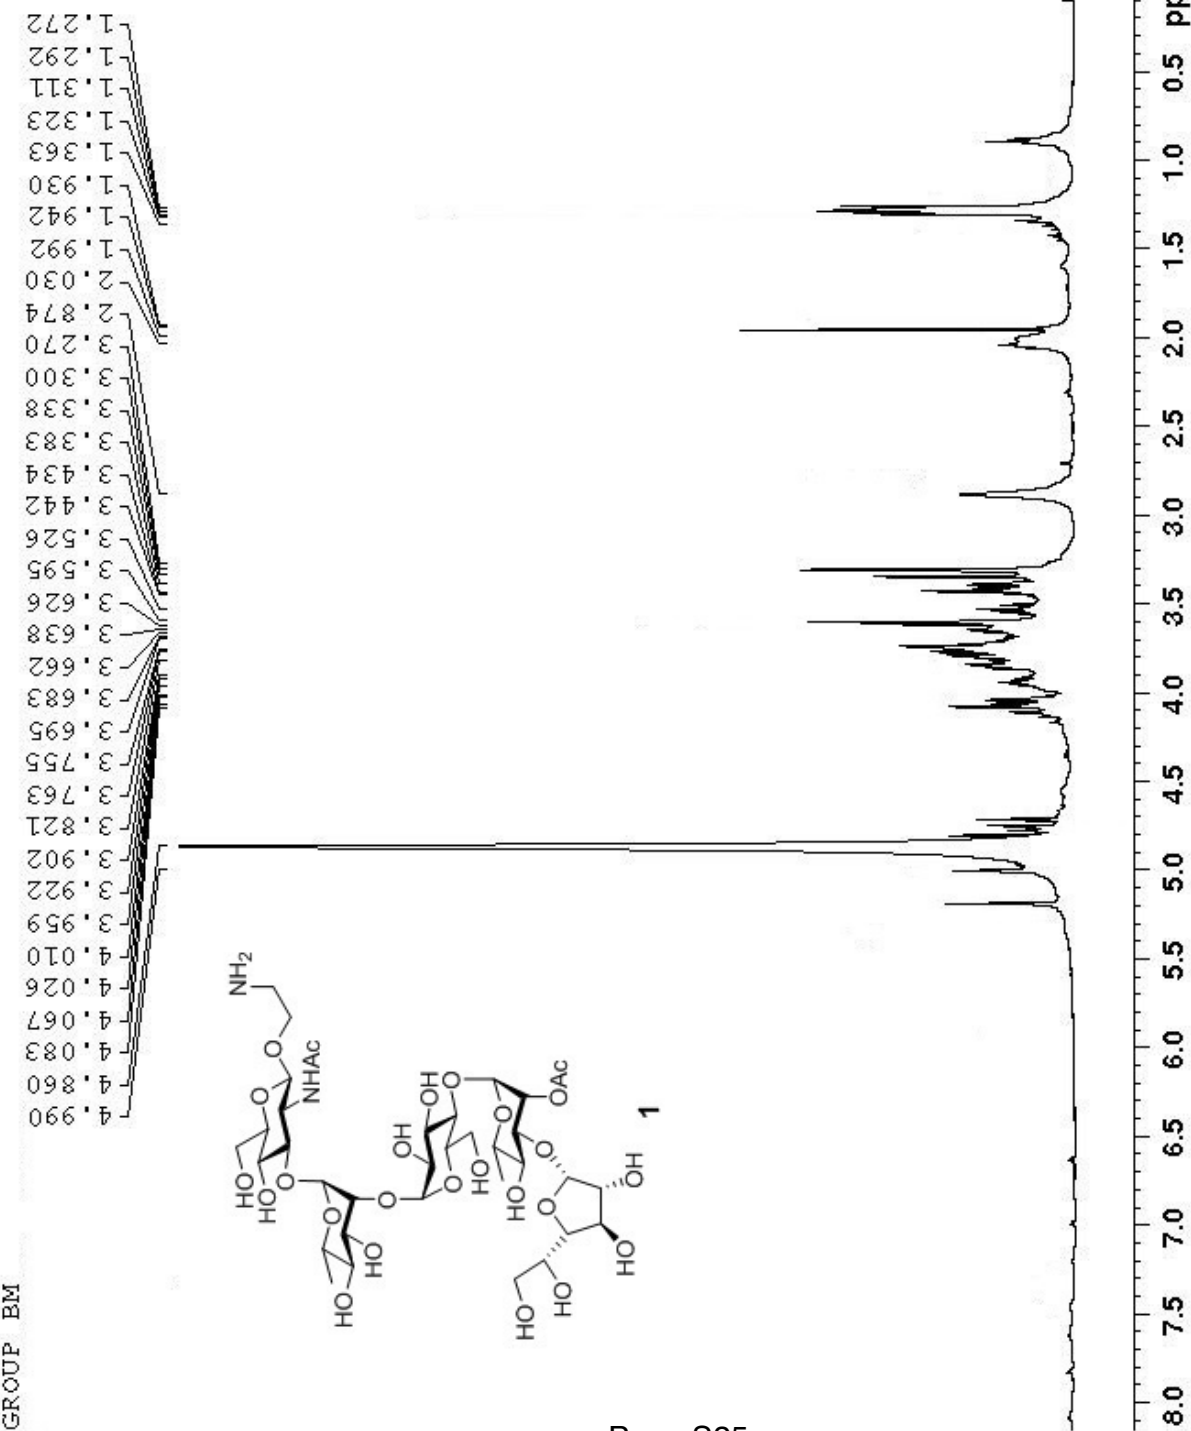

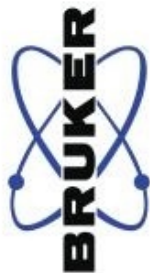

GROUP BM  
BM-DP-090 in CD3OD

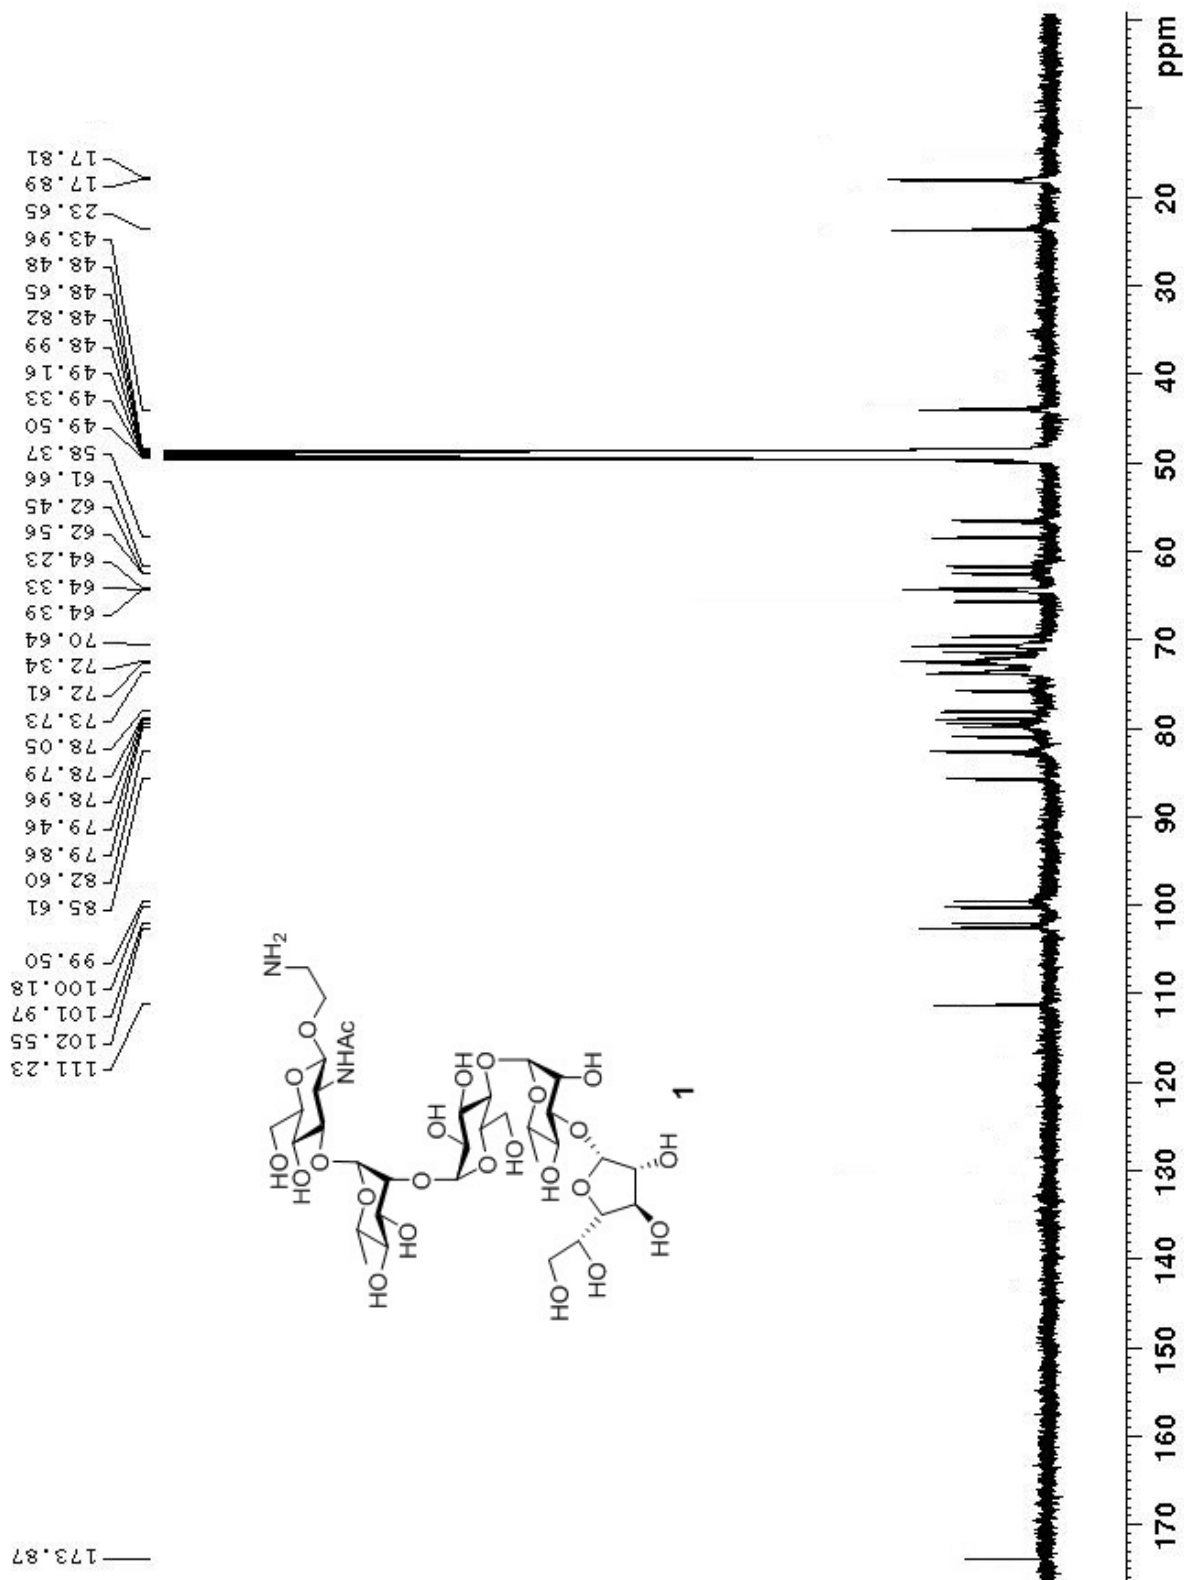

Current Data Parameters  
NAME BM-DP-090  
EXPNO 170  
PROCNO 1

F2 - Acquisition Parameters  
Date\_ 20181127  
Time 16.49  
INSTRUM spect  
PROBHD 5 mm PABO BB/  
PULPROG zgpg30  
TD 65536  
SOLVENT NaOD  
NS 20000  
DS 4  
SWH 43859.648 Hz  
FIDRES 0.668245 Hz  
AQ 0.7471104 sec  
RG 203  
DQ 11.400 usec  
DE 6.50 usec  
TE 282.2 K  
D1 2.00000000 sec  
D11 0.03000000 sec  
TD0 1

===== CHANNEL f1 =====  
NUC1 125.8274000 MHz  
P1 150  
PL 11.50 usec  
FLM1 66.00000000 W

===== CHANNEL f2 =====  
NUC2 500.3020010 MHz  
P2 1A  
PL 1A  
PCPD2 10.00000000 W  
PLM2 0.47552001 W  
PLM3 0.24068222 W

F2 - Processing parameters  
SI 32768  
ST 125.8100236 MHz  
WDW EM  
SSB 0  
LB 1.00 Hz  
GB 0  
PC 1.40
